# Supplementary material for: Aphids acquired symbiotic genes via lateral gene transfer
Source: PubMed Central journal article supplement (PMC2662799; doi:10.1186/1741-7007-7-12), 2009-03-10
Supplement: 1741-7007-7-12-S2.pdf [file 1741-7007-7-12-S2.pdf]

# A

|                                     |                                                                                                                         |
|-------------------------------------|-------------------------------------------------------------------------------------------------------------------------|
| <i>Acyrthosiphon pisum</i>          | (22)VRVIAPSSMGKPSN-----LEVFRRLRDA-GMTARVDDSIYRA--GADPFYANTDQFRAADLVDA--LTD-SCTVVWCARGGKGASRMIPYLEALPADRKQRIRDA--RKTIVGY |
| <i>Wolbachia</i> sp. wMel           | (23).DI....K..E.D-----TTIKEVVEAL-DFNPHISEK..SN---DN...S.S.E...N...S.--.G-DSKII..I...E...L....K..N.K.E..AQN--K.I.I..     |
| <i>Wolbachia pipientis</i> wPip     | (19).DI....K..E.D-----PTI.EYVKTL- FNPHISEK..SN---DN...S.S.E...N...N.--.-DSKII..I...E...L....K..N.K.E..AQN--K.I.I..      |
| <i>Orientia tsutsugamushi</i>       | (25)ID.....K.SEL-----QLIEDY.ESI-.VK.N.PEN..SD---NE.L.S...E...ES..K.--.NPKSIAI..I...R...L....K..D.V.KK.AQNK..I.M.F       |
| <i>Rickettsia felis</i>             | (29)IT.V..ATGADNKT-----SDLKN-INGL-NLQILSKCFAGK---L..L.SS.EV.FNC.R...F.E.DN...SL...Y.SA.I..G.LK.SKPN.-----E.FFI..        |
| <i>Rickettsia bellii</i>            | (32)IN.V..A.GADNKT-----SDLKN-IKTL-NLNMPKTCLSKGD---L..L.S..EI.FNC.K...YNE.SNI..SL...Y.SA.L..D.LK.SKPN.-----E.FFI..       |
| <i>Sodalis glossinidius</i>         | (47)IYL.SS..QYDENT-----IGEIKAVFQQQ-.YSVDSRYLDQQP---TPLG.V...EV..ET.IN.--.ENVKYL.FV...S..LNLY...YRNRDKIAAAS-----P.I.I.F  |
| <i>Francisella tularensis</i>       | (33).AL.NV.TQYY.ND-----IKQAEKA.K.T-.YNTTYKYLDIYP---S.FG.S.P.SI..KI.L.--.L.KNIDII.FLK..G..FNLL...YDHINEL.KAK-----P.I..F  |
| <i>Vibrio augustum</i>              | (21)IAL.SC.TQYDEQS-----VNNVVDTFIAQ-.YMVTTKYLNQVI---S.IG.V...E..NN.IA.--.L.PTID.L.FF...G..LNLL.F.H.YKTOLLEIK-----P.MI..F |
| <i>Rickettsia felis</i>             | (12)ISI...A.GCLDAR---DK.KEAIKI.ALH-.FKTLI..K.FLG--DELL.F.APKEE.LRMPKE.--MENEQVKII.AF...Y.C.EFVEDCFNIKQKG-----D.I.I..    |
| <i>Rickettsia bellii</i>            | (12)ISI...A.GCPDAQ---DR.AKSIEM.NLQ-.FKTL..K.LVG--DEL..FVAPKAE.LRMPKE.--MENEQVKII.AF...Y.C.EIVEDCFNIKQKG-----D.I.I..     |
| <i>Salmonella enterica</i>          | (12)ID.....PIDNPQ---ERYKKIEQYFKENTPFKINIP.HLIEP--T.LLDE...IWK..KFVY...FCS-ESKAI.AIS..GWGASILGE.MSY.KPD.-----I.PII..     |
| <i>Bdellovibrio bacteriovorus</i>   | (11)ID.V..GYPS..EE-----V.GA.A..EKW-NLQP.IPKG.IKP---HFLH.HE.EA.WQFMKA.--IESKDSR.I..L...Y.SN.L..F.AKMKPKPE-----P.L.I.I    |
| <i>Rickettsiella grylli</i>         | (20).DI...A.GVSDTS---TMRKLKNL.ESW-QLIP.ISS.LLGS----LLC..S.EN.FQH.QE.--SNTDSQAI..L...Y.CT.L...LK.T.PE.-----C.LFI.F       |
| <i>Pseudomonas aeruginosa</i>       | (17).AL...A.AIATDV-----ATL.Q.EVH-.VDYHLGRHVEAR---RYRL.G.VEQ.LE..HN.--FDMPDI.A..L...Y.CGQLL.G.DWGRLQAAS-----PRP.I.F      |
| <i>Burkholderia cenocepacia</i>     | (7).A.V..AGIPDRD.-----ARAVSL.ESW-.FSVS.GAHVTRD---FRYL.GSR.D.ID..LA.--S.PAVDI..I...Y.STHVL.A.PTTVPR-----K..VI.F          |
| <i>Bacteroides thetaiotaomicron</i> | (14).VIVS...KIDKEF-----KRAKRR.ESW-.LKVS.GKYAGGS---SGR..G.VRQ.LQ..QS.--MD.PKVKAIL.S...Y..VHLVDKIDFTAFREH-----P.W.L.F     |
| <i>Cytophaga hutchinsonii</i>       | (6)IH.VS.AGAVNKI.-----AAGISYVSGF-DFLIKAGK..FQK---KGYF.G..TD.QY..QL.--D.PNALAI.V...Y.TT.I.DTISWKKFFK.-----PSWII.F        |
| <i>Anaeromyxobacter dehalogenan</i> | (12).....PFE.EQ-----ARGLAV..RL.LEP.MRADLGR---ARYL.GD.AR.LEEWRE.--VA.PDARAIF...F...LL.EVDPA.LLER-----P.A...F             |
| <i>Stigmatella aurantiaca</i>       | (31).H.V..AGPFDKAG----F.AGLAIIQ--RYSPVYGPDLFSS---HRYL.GQ.SR.REE.SRV--R.PQGRAIFA...Y.SM.LL.G.PLA.E.G-----PSA...F         |
| <i>Crocospaera watsonii</i>         | (18)IVG.S..GPI.DVT-----AI.KAQEIM.SQ-.YNLELKGHWNDQ---YGYL.G..EQ.RD..LE.--FKNPNYKAIIV...Y..A.LLEEKDWKTIIFTNY-----P.W.I.F  |
| <i>Desulfotalea psychrophila</i>    | (24)IG...GRLSN.D---AFYKGLHI.EGF-.YRL.FPRKLWPG---SDYL.D.EN..LEFHKM--WA.EEVQALI.M...Y.VL..LEF..LKEIKKT-----P.Y.L.F        |
| <i>Bordetella bronchiseptica</i>    | (9)IAIV..A.AIAGAA-----DEAAEW.LER-.YEPQ.MPAARARLAPPFYLD.GD.AA.L..HA.--FA.PAVGA..LQ..F.SW.VLDQIDYGLLR.H-----A.PFI..       |
| <i>Pseudomonas entomophila</i>      | (20)FAIV..AGPARVDA-----DKA.QWFERR-.YRC.LYPGVSQ.----GYL.GS..Q.LQ..H.--FR.PGIDAIL.M...Y.SM.LLDA.DLELIR.H-----P.P.I..      |
| <i>Streptomyces coelicolor</i>      | (15).A.V...GPVPEER-----QAGLDV..GW-DLDPV.APHVLDLDR-HDTFDYL.G..AD...QA.--WC.PAVDA.L...Y.VQ..ADL.DWEAMRAAG-----P.VF..F     |
| <i>Symbiobacterium thermophil</i>   | (17).G.V..AGPVP.EA-----EGL.R..AW-.YRTV.GEAVLDR---RGYL.GA.DR..E.FNRM--WA.PAVDA.I...Y..M.ILRRIDWELIR.N-----P.FFC.F        |
| <i>Clostridium beijerinckii</i>     | (12)IGL..A..PT..DR-----I.PSIKAMEEL-.LEVVLGK.CKCY---HGYSLSG.EI..N.INKM--FD.KTIKGIFAI...Y..G.LLSM.DYNNMIK.N-----P.VFA..   |
| <i>Clostridium novyi</i>            | (11)IGLVS...PEN.DK-----IKESIA..KEQ-.FKIKEGKHL.DK---RGYL.G..KN..E.FNM--FL.DEVSMIL.V...Y..M.IL..DYEKIKEN-----P.I...F      |
| <i>Bacillus licheniformis</i>       | (13).G...A.PPV.EK-----DRAV...KEL-.LEVK.GR.AAER---HGYL.GS.EE.LG..H.M--FE.R.VKA.I..C..Y.TA.IAGKIDYRLIKSR-----P.IFW..      |
| <i>Bacillus cereus</i>              | (12).MI...GPPTIE.----VLKGVNV.QEM-.LSVIGK.V.EK---YG.L.GS..V.LD.IHE.--F.NNEVKAIF...Y.SA.LL.HIQYEVIRQN-----P.IFW..         |
| <i>Spingomonas</i> sp. SKA58        | (45).GL.E.AGFTDDAF---D.DLVEDTI.AM-.LKPKRAPHLIDR---FGYL.GK.AY..S.VNAM--FA.PAVSAIFAV...W.CA.I.L.L.DWRKIRSN-----P.L.I.F    |
| <i>Anabaena variabilis</i>          | (68).GL...AGTFE.RY-----I..VQQH.TNL-.LK.K.GRH.LDR---YGYL.GR.AD..Q.VN.M--FV.D.VQAILAM...W.CN.I.L.L.NYPLIRSH-----A.I.M..   |
| <i>Neisseria gonorrhoeae</i>        | (61)L..V.S.GFAEDT.----RVNTALTR.YN.-.F.VTNQQAGS.R---FQRF.G..AQ...FQEVASGRVATPK.LMGL...Y..A.I.L.HIDFASLGARM.EH---GTLFF.F  |
| <i>Escherichia coli</i> LdcA        | (3)FHL...GYCIKQH---AALRGIQR.T..-HQQNNVEV.A.R---CERF.G.ETE.LE..NSLA-RLTTPN.I.LAV...Y...LLADIDWQALVAR.QHD---PLLIC.H       |
| <i>Chlorobium ferrooxidans</i>      | (14)IGL.S...HCAYPV-----KIQQAISY.EAN-.YRVKLSHSLN.I----.TDP.VA.REKHL.IHEM--FS.PDVRAIF.L...A.SA.LLNQ.DYTLTIAAN-----P.I.A.. |
| <i>Thermoplasma acidophilum</i>     | (13)I..I...A.APDMK.----SRSIAR.KKS-.YRVTLGRN.KKL--MQMNQL.AP.TS.RDE.ME.--FL.DHVKAIF...Y.SIHIL.LIDYDAIRDH-----P.IF...F     |
| <i>Ferroplasma acidarmanus</i>      | (15)I...A.A.PDMIK.----SRGISK.KKL-.YKVT.GKN.KKL--NQRNDL.APAKD..EE.MS.--FR.DNVKAIF...Y.SIHILSL.DYEAIREN-----P.IFM..       |
| <i>Gibberella zeae</i>              | (15)IAF.S..ERINSTL--PAVVDRASAV.SNK-.YHVQTFE.ED-----NGIQSCIDN.LSEIRA.--FS.P.IAA.ITTI..TTFTTELL.A.I.DKELHEIRAN---P.VV...F |
| <i>Haloarcula marismortui</i>       | (18).A.V..A.NAPE.A--RFIY.LGLERM.EVFDLDPVAYPTATAD---PEWL.DNPEA..EEIMK.--FR.PDISA.IANI..HDQIT.L.F.DGDVLRH-----P.TRFY..    |
| <i>Bacillus cereus</i> ATCC10987    | (12)IGIYS...PVYTS--PKRF.RAKSY.QQK-.FHILEGSLTG.Y----.FYRSGSI.E..EE.NVL--IRNPNISCIMSTI..MNSNSIL..IDYDAFLKN-----P.IMI..    |
| <i>Lactobacillus casei</i>          | (12).AIVSL.AGTLGESFAAHQ.QLGTER.KAM-KLEP.FMPNAL.G---QAYLKAHPEA...KA.--FL.P.IKGII..I..DDTY.I...LDD..FTQAVADH---P.LFT.F    |
| <i>Bacillus cereus</i> ATCC10987    | (13).ATVS..WG.AGDSEIRWRY.QGVKR.EEVF.L.VVPMPNLSLQ---SE.IY.NP.A..E..MT.--FQ.TRVKAIIANI..QDSI.LL..IDFNAIREN-----P.IFM..    |
| <i>Escherichia coli</i> MccF        | (18)IGFFSS.APATVTA--KNRFFRGVE..QRK-.FKLVSGKLTGKT---.FYRSG.IKE..QEFNEL--VYNPDI.CIMSTI..DNSNSLL.F.DYDAIIAN-----P.III..    |
| Consensus                           | 0 0 0 ** *                                                                                                              |



*Acyrtosiphon pisum* ERSLDHMKLAGVFDGATAVVFSGFSV (14) DDHLMALVFRFAATV-----LFPVFRVDGIGHSFVNPLPLNTEATVVGPTL (31)  
*Wolbachia* sp. wMel . . . . . L . Q . HI . . . . . VH . . . . . I . . . . . D . VN ( 2 ) N . N . VEV . KE . . . . . KS . ----- N . . . . . TMK . V . . . . . GHT . D . . . . . F . . . . . H . I . SVQDEK (12)  
*Wolbachia pipientis* wPip . . . . . L . Q . HI . . . . . VD . . . . . I . . . . . D . VN ( 2 ) N . N . VEI . KE . . . . . KS . ----- N . . . . . TIK . V . . . . . GHR . D . . . . . HTIISMQDEK (10)  
*Orientia tsutsugamushi* . MR . E . L . Q . HIL . EVQ . . . . . I . . . . . DILC ( 2 ) . EQ . LE . . . . . KH . . . . . QS . ----- N . . . . . TLN . . . . . ART . Y . . . . . R . VINHIKGN (15)  
*Rickettsia felis* D . E . L . L . Q . . . . . LLEDVK . II . . . . . GK ( 0 ) . LDATM . . . . . L . N . . . . . DNL . ----- NI . . . . . KTNRF . . . . . EKI . D . . . . . IY . . . . . DSKIIIMGKKN ( 8 )  
*Rickettsia bellii* D . A . IQL . Q . . . . . LLENIK . . . . . I . . . . . T . DK ( 0 ) . SK . TM . . . . . L . N . . . . . NNL . ----- KV . . . . . KT . RF . . . . . EKI . D . . . . . IY . . . . . DSKII . NGEK ( 7 )  
*Sodalis glossinidius* D . T . HQLEYKKN . H - PK . . . . . I . . . . . Q . YS ( 6 ) EKD . YRY . LQE . . . . . NR . ----- DY . . . . . YYYPEF . . . . . GKT . Q . FI . GQQMQLCNEHY (12)  
*Francisella tularensis* D . . . . . HQLLYLPENKKPE . II . . . . . Q . YP ( 6 ) QRLIYKT . IKK . . . . . K . F . ----- NR . . . . . YFFPF . . . . . GQY . K . . . . . L . GVTSNIKCSKET ( 8 )  
*Vibrio augustum* D . Y . QQLLFLKD . . . . . -VN . I . . . . . QYYN ( 6 ) . RLMYKH . LEQ . . . . . KQL . ----- GK . . . . . YFFPF . . . . . GKY . Q . VIFGRQVSLQRHELN (14)  
*Rickettsia felis* H . N . VQL . N . . . . . T . ECIE . II . . . . . D . TK ( 0 ) G . EFVEQA . IKS . CLNHIP . --- . HIEAYKA . . . . . GE . . . . . H . VIM . H . VIINSNVLS (11)  
*Rickettsia bellii* H . N . VQL . N . . . . . I . . . . . IE . II . . . . . D . TS ( 0 ) G . ENIE . A . IKS . CLNHIP . --- . NIKTY . AE . . . . . GT . . . . . Q . VIM . H . VVIS . NYLS ( 8 )  
*Salmonella enterica* S . K . MGLAYSP . IKNCLG . I . . . . . DVIK ( 9 ) VQSQFDYIIH . . . . . SEKFIG . -- . DKIALKANNIF . . . . . GAI . M . . . . . F . VIKRNGAS (10)  
*Bdellovibrio bacteriovorus* D . MFEQFRQ . . . . . ILKKCHGI . L . D . IG ( 6 ) TEDKTQ . . . . . K . W . . . . . DL . ----- EI . L . KGLEA . . . . . AP . QR . V . F . . . . . PCEL . MANNR (11)  
*Rickettsiella grylli* D . M . Q . LYQS . I . . . . . NHVK . I . . . . . L . N . TF ( 5 ) EEEKIQTILK . . . . . IEQ . ----- HC . . . . . L . CPEV . . . . . GRK . RS . . . . . FGKQ . HLDLKN ( 7 )  
*Pseudomonas aeruginosa* . . . . . WQLLESIDARQLG . ICL . . . . . TD ( 5 ) VA . SLERI . GEY . . . . . AI . ----- EV . LYHHLPS . . . . . GAQ . RAW . YGKT . VLE . NRLR ( 1 )  
*Burkholderia cenocepacia* D . . . . . IMT . RH . . . . . IL . . . . . R . I . L . D . VR ( 6 ) ANY . LTD . LLDVL . PL . ----- GA . IYGLPV . . . . . GQR . LSWVGRP . EIR . GILF ( 1 )  
*Bacteroides thetaiotaomicron* . . . . . MMYNL . . . . . G . . . . . LEKLSGLII . Q . TE ( 6 ) LGKELYPALADLVKEY . ----- DY . . . . . CFNFPV . . . . . VTH . L . . . . . INGAKVELTVGKKN ( 7 )  
*Cytophaga hutchinsonii* D . M . MVQL . RS . KLK . KLKGLIV . HMTD ( 6 ) FGQSVTDIILSHTKEY . ----- T . . . . . ICFDFPA . . . . . EAP . M . VI . GLKSELIVAKSE ( 6 )  
*Anaeromyxobacter dehalogenan* D . Y . TQLR . . . . . AL . . . . . VAG . AL . Q . TE ( 3 ) AGVRG . E . V . ELVSGL . ----- GV . . . . . AEGFPA . . . . . DDA . FSV . . . . . GAR . . . . . L . A . GPG (22)  
*Stigmatella aurantiaca* D . M . WMTQLR . . . . . L . QQVRGI . L . D . TA ( 5 ) AEYTS . E . L . SL . QEE . ----- GL . CAAGFP . . . . . GAL . F . V . . . . . GVTVRLEADKAQ (10)  
*Crocospaera watsonii* D . M . TQWR . L . A . S . VKGIAL . R . . . . . IG ( 5 ) NSWTVEE . L . DRLGDL . ----- GI . IVSELFP . . . . . DG . . . . . AI . . . . . VGMTVKLD . DRGS ( 5 )  
*Desulfotalea psychrophila* D . M . TQLAY . . . . . K . KD . VAGILL . D . . . . . (11) HREMVSRLLEIVGKR . ----- NI . . . . . LAGIRS . . . . . IMD . H . . . . . L . GSTVR . APGE . R ( 9 )  
*Bordetella bronchiseptica* D . M . AQLRR . . . . . A . . . . . VRG . LV . . . . . TR (10) AQAALYPLV . EHFQAR . ----- GI . . . . . LAGWPS . . . . . GDP . LT . . . . . GARV . LDAGRGA ( 9 )  
*Pseudomonas entomophila* D . L . TQLR . . . . . KLE . VRG . LV . D . AG ( 1 ) TVASLTPLLLDIFGPL . ----- GV . . . . . LAGWRS . . . . . CNP . VC . . . . . GARVQLDAGQQR ( 10 )  
*Streptomyces coelicolor* D . Y . TQLRS . WL . . . . . VGG . LL . . . . . WAQ ( 2 ) PYERLRPLLADRLGGL . ----- GV . . . . . VEDF . F . . . . . CEGALTV . FGVP . ELDAD . GT (12)  
*Symbiobacterium thermophil* D . M . VQLL . . . . . KLQ . . . . . AGIL . . . . . DSP ( 8 ) PSLTLPE . LTELLGPL . ----- GI . . . . . LYGFPC . . . . . GPHRAT . . . . . GVRTRLDAAGGT (10)  
*Clostridium beijerinckii* D . M . LQL . QC . K . KD . AGIIL . . . . . WTG ( 7 ) NSLTLMEI . EELIKPE . ----- NT . TIYNLAC . . . . . CAPTISI . . . . . GARVKIN . ERSE ( 4 )  
*Clostridium novyi* D . M . SQL . E . G . KLKDCSGFII . Q . TK ( 7 ) RSLTLEEILEDKILSL . ----- GK . TISNFMS . . . . . DYPKLT . . . . . IGARGVINCN (9)  
*Bacillus licheniformis* D . M . NQL . M . . . . . KLS . D . AGILLCD . HN ( 7 ) KSLTLKE . . . . . QDYI . SE . ----- GK . ALSGFK . . . . . CSP . IAV . VGVK . VLDAGKKR ( 8 )  
*Bacillus cereus* D . M . NQL . S . K . NECRG . I . T . CHD ( 5 ) PSQSLQTI . LY . EYF . PY . ----- HI . . . . . LFDLP . . . . . ISP . IGI . . . . . GAT . . . . . INTNKT (13)  
*Sphingomonas* sp. SKA58 D . M . TQL . . . . . G . IL . KLAG . A . . . . . QCTD ( 8 ) GGFTVSE . LQQHL . PL . ----- GI . A . QGGQF . . . . . VANQYS . . . . . GIQ . EMDAT . GT ( 9 )  
*Anabaena variabilis* D . M . TQL . N . . . . . ILYRISGFI . . . . . QCTD ( 6 ) KSQTLIE . LQDHITPL . ----- KI . . . . . SWYGAM . . . . . IQDKFI . . . . . IGANVEIDADAGT ( 9 )  
*Neisseria gonorrhoeae* . . . . . M . NTLY . S . ILGQR . I . . . . . D . RM ( 8 ) SSYDFS . A . AKHISR . A . ----- KI . . . . . LTGFPP . . . . . IADKITF . . . . . GAHTRIRMNGNG (41)  
*Escherichia coli LdcA* . . . . . M . LQLYH . . . . . ILPRQK . IIL . . . . . G ( 7 ) AGYNLES . YAF . LRSRL . ----- SI . . . . . LITGLDF . . . . . EQRTVT . . . . . GAH . ILNNTREG (13)  
*Chlorobium ferrooxidans* D . M . S . LSN . . . . . LLARCG . LL . . . . . Q . S ( 6 ) EAERVKNI . DY . YSTLNP . --- . NAT . LSGLSY . . . . . IRELMTI . IGARFR . SVTASG (13)  
*Thermoplasma acidophilum* D . Y . FT . . . . . IL . KFEF . GA . . . . . E . KS ( 6 ) PMPFVEDIIEMYNLSL . ----- KKVSIYGLPF . . . . . GEDQMMI . . . . . ARVRSYEEPY ( 9 )  
*Ferroplasma acidarmanus* D . YFFS . . . . . HIIEQFNGF . . . . . D . KA ( 6 ) PMP . SIED . VQK . MNEI . ----- NK . SLYGAP . . . . . GEEQMV . . . . . ARIGISDEEYPY ( 9 )  
*Gibberella zeae* QAAFADLIAQ . . . . . EE . AGL . V . RPYG ( 5 ) . RETY . GI . IKLLCEGR . LASKK . . . . . ILFNVD . . . . . TVPMLT . . . . . YDAL . ELDSE . GT ( 9 )  
*Haloarcula marismortui* GAN . RALGER . LLERFDG . LV . RACA (14) YRERQRDTIADILK . YNP . --- . NA . . . . . VFNCEF . . . . . TYPTC . I . IGG . VELEPA . KS ( 4 )  
*Bacillus cereus* ATCC10987 . . . . . FSL . L . IN . . . . . KISGII . L . KHEQ ( 5 ) TNRKPF . EILLEVLQ . NQ . ----- RI . . . . . FLADFDCC . THPMTM . IGIQVKLDATNKT ( 9 )  
*Lactobacillus casei* RTY . E . LDEH . . . . . LAQVK . IILV . KPQN ( 2 ) YFDAYQQ . LLDITQPY . ----- KT . ILYNLNF . . . . . AYPRTV . . . . . YGLQT . . . . . DFDQ . Q (12)  
*Bacillus cereus* ATCC10987 KYW . RNYAAQ . ILQK . KGII . . . . . KP ( 2 ) YEEYKHEILQVMKEHNL . -- . EDL . ILYNLNF . . . . . TEPKFI . . . . . YGSM . EIDCENG ( 9 )  
*Escherichia coli MccF* . . . . . LFSML . . . . . NR . . . . . KVS . IIL . KHEL ( 5 ) SKRRPYE . LTEVLDGK . ----- QI . . . . . LDGFDCS . THPMLT . . . . . GVKLAIDFDNKN (12)  
Consensus 0 \* 0

Continued.

**B**

*Acyrtosiphon pisum* ( 93)DDVFERGVCSYY-----KGPSITANGDVFENEMTAHRRLPFNTMVKVET---MGTSVVVKINDRKTAAADGKVMLLSRAAAESL( 55)

*Aphis gossypii* ( 85)NS...K.T.A.-----Q.GIE...E.N.....Q.....N..I-----R....DDLN.HILDM.F...AV( 52)

*Toxoptera citricida* ( 29)NN...T...A.....K.IE.....E.I..D.....N..I-----A...R....DDSN.HILDMYLL...GI( 0)

*Spingopyxys alaskensis* ( 70)TGHSFS.MA...G----NES.SR...S.ER.NQ.A.....S...G.KLR.TH----G.S...I.T...GPFIR.R.LD..TG..RAI( 16)

*Bradyrhizobium* sp. ORS278 ( 95)LQTASS.LA...S-----E.HK...S.ER...PS.L....S...G.RLQ.TNVR--T.R...RV...GPFVQ.R.VDV.YS..QA.( 16)

*Cytophaga hutchinsoni* (138)AGQSGQCLA.M.G-----DPQP...S.EI..PTQL...P...H...E.TNTA--T.R..T.R...GPYVA.RCLD..T..FSAI( 16)

*Comamonas testosteroni* (146)VMEGTGSCGA...S-----E.QL...S.ES..PSA....K...D...R.TNPV--TS...T.R...GPFIT.RCID..Q..FAVI( 16)

*Polaromonas naphthalenivorans* (162)KSFT.T.YA.W.GGLKDGFB.KK-....R.NR.LL...K..LPCL...TNKA--NNKA.ILMV...GPFKNRIIDV.QR...I.( 73)

*Pseudomonas fluorescens* ( 57).HYE.I.IA.W.G---EGFHNLK-....SRFSL...K...MPSF.EITNLE--N.KK.I..V...GPFVENRIID..EK..IL.( 92)

*Pseudomonas putida* ( 49)KHYE.I.IA.W.G---IEDH.TL-....EA.NRHLS...K...LPCF.L.TNLE--N.RKL.TRV...GPFIE.RIID..EK..QV.( 93)

*Chromohalobacter salexigens* ( 81)TKYKAE.LA.W.G---DAFH.RL-....E...MASLS...P...LPCY.R.TNLG--NSK.L..RV...GPYHGNRLIDV.NK...L.(116)

*Salinibacter ruber* ( 87).GYD.T.IA.W.G---PNFH.RP-....ET..QHA....T...IPSI.E.TNLE--N.R..I.RL...GPFV.NRLID....TE.(153)

*Borrelia burgdorferi* ( 71).KYDAT.IA.W.G---PQFH.KQ-....EI..Q.A....P...MPVLR.TNLE--N.K.II.R...GPF.A.REID..KH...Q.(186)

*Rickettsia conor* ( 71)F.YD.T.IA.W.G---PDFH.KL-....E...Q.AVS...K...MPSV.R.TNLE--N.R.L..RV...GPF.H.R.IDM..RS..QL.(174)

*Anaplasma marginale* (108)VPW...I..A.W.G---EPFH.RR-....E.Y.MHG...K.M.LPSYAV.RNRV--N.RQ...RV...GPF.I..R.ID..F...RK.( 40)

*Wolbachia* sp. wMel ( 56)PRSV.T.LA.W.G---PGFE.RQ-....EI..STQL....MRLPSRAR.TRLD--T.A.II.RV...GPYI..RLID..H...QA.( 59)

*Magnetospirillum gryphiswaldense* (108)KPYK...QA.W.G---KRYH.QR...S...Y.MYS...P...IPSY.R.TNLQ--N.S..I.R...GPFLESRLID..YV..HK.(127)

*Parvibaculum lavamentivorans* (122)ERYKT..MA.W.G---RRYH.QK...S.E.Y.MYA...P...IPSYAR.TSVT--S.K...RV...GPF.LS.NRLID..YT..YK.(190)

*Maricaulis maris* (124)RNYV...TA...G---AKFH.RL-..S.RE.Y.MYQF...K...LPSFAR.TNLD--N.E..I.RV...GPFH..R.VD..Y...VR.(217)

*Nitrobacter winogradskyi* ( 95)RAYRMV.TA.W.G---TKFH.QA-....E.TY.LYG...K...LPSY.R.TNLD--N.K..I.RV...GPFYSDR.ID..F...KK.(164)

*Nitrosospira multififormis* ( 55)AEFTQT.NA.W.G---GRFH.RK-..SG.ERY.M.AF...K...IPSY.R.TNTK--N.K..I.RV...GPFHGNRIIDV.K...QK.(102)

*Nitrosomonas eutropha* (108)K.FR...IA.W.G---SKFH.HL-..S.E.Y.MYA...K...IPSY...RNED--NNKEII.RV...GPFHE.R.ID..Y...YK.(107)

*Neisseria meningi* ( 72)KGFT.S.KA.W.G---KKFH.HL-..S.EIY.MYS...K...IPSY...TNTD--N.K.T.RV...GPFH..RIID..Y...YKI(109)

*Pseudomonas aeruginosa* (163)AAFA.T.IAIV.G---DEFA.LP-....E..SQT.L...PS..LPSL.S.TNVD--T.RE...RV...GPFE..ANVQ...K...T.(165)

*Vibrio cholerae* ( 74)SRFSQA.LAAI.D---AEPGSNL-..S.EA..PTQL...P...IPSYARITNLA--N.RMI..R...GPYGNDR.IS....DR.(206)

*Shewanella denitrificans* ( 71)QNFSQI.LAAW.G---EEAN.NT-..S.ET..P.AL...P...IPSY.R.TNVS--N.RQI..RV...GPYTS.R.ID..K...DR.(219)

*Stenotrophomonas maltophilia* ( 46)VGDTAS.IA.W.G---PNFH.KK-..S.ESYMN.A...K...M...SNLK--N.K.T.R...GPFVA.RIID..K...NDI(111)

*Methylibium petroleiphilum* ( 78)R.GQ.T.IA.W.G---PTFY.KR-..S.AI.RK.AL....LG.R.R..NLE--N.R..D.V...GPFV.R.ID..WK..NAI(103)

*Hypomonas neptunium* ( 51).CRY.V.YA.W.G---PKFHYRK-....ER.NMFKL...S..FSLG.Y.L.YNLE--N.KFT..R...GPYV..RIID..M...DEI( 38)

*Yersinia mollaretii* (125)CPKYI..YA.W.G---GKFH.RK-..S.IR.NQH.YY...Y...G.LLE.KNLK--N.RK.I..VV...GPYVR.RHLD..Y...KK.( 19)

*Escherichia coli* (102)N.FKQE.TA.W.G---PGFH.KK-..S.EI.NQ..L...KR..LG.KIR.TNLK--N.K...GPFHSNR.LD..Q...QKI( 16)

*Oceanicaulis alexandrii* (113)S.FRQT.RA.W.G---KGFH.RR-....ER.NM..F...LASY.R.TNQA--N.K...GPF.SR.RILD..Y...KVI( 35)

*Haemophilus influenzae* ( 80)S.FHQT.RA.W.G---RGFH.RR-....ERY.MHAL....LGSY.R.TNPA--TSR...R...GPY.R.R.ID..M...SA.( 38)

*Microscilla marina* ( 40)LNSATV.LA.W.G---EAFH.KT-....EK..MMAL...KE...T...TNLL--NNR...R...GPF.RKDRIID..KY...K.(153)

*Shewanella putrefaciens* ( 60)NTLVGE.KA.F.A---NQFH.RT-....ET.NM.KL...PS...G.W.R.TNMR--T.KD...R...GPFV.K.RIID..IG..KE.( 25)

*Salinispora tropica* ( 80)GLPDAQ.IA...A---DKFV.RT-....EIY.HQGL....S...G.R.R.TRIDAPAQP...R...GPFK..RIID..K...GR.( 43)

*Thermobifida fusca* ( 77)RESDAQ.LA.W.G---EQFH.RK-..S.ER..SMD...K...G.R.C.RSSV--T.K...R...GPF.P.R.ID..K...QE.( 66)

*Erythrobacter litoralis* (113)ALEL...HA.W.G---GQFH.RR-..S.ENY.KYAL...K...G.I.R.RSLA--L.RE.D.R...GPF.P.R.IDV.Q...A.( 43)

*Chlorobium ferrooxidans* ( 80)ARSLGM..A...G---RKFH.RR-....ER..M.G...K...G.K.R.TNAS--N.R...R...GPFV.R.TID..K..GD.( 16)

*Campylobacter fetus* (241)IQFQFQ.WA.W.G---PGFH.RL-..S...ER.NQYA...K...G.K.R.TNLH--N.S..I.R...GPFIP.R.ID..S...DV.( 19)

*Aquifex aeolicus* (233)VTSRRK.MA.W.G---PGFH.RL-....ER.YNQ.GL...K...G.Q.R.TNLR--N.R..I.R...GPFV.G.R.ID..KG..SVI( 17)

*Burkholderia phytofirmans* (223)IKRIKG.IA.W.G---PGFH.RR-....ER.NQ.AL....G.R...TNLR--N.Q...R...GPF.TG.R.ID..AG..RAI( 16)

*Burkholderia mallei* ( 16)GATS...QA...H---DRYQ.QR-..S.EPY.AQAL....R...D.R.R.TNLD--N.RQ.T.R...GPFTE.R.ID..R...R.( 16)

*Leptospirillum* sp Group II UBA ( 25)RGYDQT.TA...G---SRHH.KR-..S.EP.NQHAL....S...G.R.R.TNMA--NQR...R...GPHTR.RLID....KI( 17)

*Dichelobacter nodosus* ( 25)HGYDQT..A...G---AKHH.KR-..S.EA.NQ.SL....Q...G.R...TNLK--NDE...R...GPHTR.RLIDV....Q.( 17)

*Bradyrhizobium japonicum* ( 39)VGFT.T.QA.F.G---DKHQNKQ-..S.ELYKHKLK...KK...GSS...TNVK--N.K..I...GPFV.R.IID..KS.FS.I( 16)

*Trichodesmium erythraeum* ( 13)KNFIQ..IA...T---DRFD.RK-..S.EI..NR.LVGS.KK....TNLA--NKR...R...GPY.H.RIIDV.KS..NLI(153)

*Crocospaera watsonii* ( 65)KSYIKE.LA...H---LKFD.RK-..S...YNSKQF...K...I.SYAL.TNLH--NNRK.I.R...GPF.S.KRLID..H...KEI(140)

*Synechocystis* sp. PCC 6803 ( 34)ETEIVG..A...G---NELA.NR-..S.ER..PGQL....GS..R.TNVA--T.D...R...GPF.H.R.IDV.H...REI( 18)

*Haemophilus ducreyi* ( 39)KSEPTT.SA...A---NKFQ.KR-..S.ETY.K.KF...YA.G.KL..TNIK--T.IWIQ.YV...GPY.KDRIIDV.Y...TA.(128)

*Actinobacillus pleuropneumoniae* ( 77)RSHYQS..A...A---DKFN.RR-....ER.SNSA...K...G.L.E.TNTR--N.R...RV...GPY.HAR.VD..K...RQ.( 28)

*Aquifex aeolicus* ( 72)RSHYQS.IA...G---DQFN.RL-....EL.SN....K...G.LLE.TNVR--N.R..I.RV...GPFY.GSRIVD..K...IE.( 30)

Consensus \* 00 0 00 0 \*\* 0 0 0 0

Continued.

The GenBank accession numbers of sequences used here are as follows: (A) LD-carboxypeptidase. *Acyrtosiphon pisum*, AB435382; *Wolbachia* sp. wMel, NP\_966741; *Wolbachia pipientis* wPip, YP\_001975416; *Orientia tsutsugamushi*, YP\_001248242; *Rickettsia felis*, YP\_246639; *Rickettsia bellii*, YP\_537751; *Sodalis glossinidius*, YP\_455202; *Francisella tularensis*, YP\_169172; *Vibrio augustum*, ZP\_01235509; *Rickettsia felis*, YP\_246832; *Rickettsia bellii*, YP\_537514; *Salmonella enterica*, YP\_216231; *Bdellovibrio bacteriovorus*, NP\_968807; *Rickettsiella grylli*, ZP\_01300534; *Pseudomonas aeruginosa*, NP\_253885; *Burkholderia cenocepacia*, EAY65659; *Bacteroides thetaiotaomicron*, AAO77656; *Cytophaga hutchinsonii* ATCC 33406, YP\_679995; *Anaeromyxobacter dehalogenan*, YP\_466599; *Stigmatella aurantiaca*, ZP\_01461884; *Crocospaera watsonii*, ZP\_00518654; *Desulfotalea psychrophila*, YP\_066013; *Bordetella bronchiseptica*, NP\_889214; *Pseudomonas entomophila*, YP\_610257; *Streptomyces coelicolor*, CAA22737; *Symbiobacterium thermophil*, YP\_076637; *Clostridium beijerinckii*, YP\_001309644; *Clostridium novyi*, YP\_879234; *Bacillus licheniformis*, YP\_078586; *Bacillus cereus* ATCC14579, NP\_831148; *Sphingomonas* sp. SKA58, ZP\_01304762; *Anabaena variabilis*, YP\_325418; *Neisseria gonorrhoeae*, YP\_208343; *Escherichia coli* LdcA, NP\_415710; *Chlorobium ferrooxidans*, ZP\_01386568; *Thermoplasma acidophilum*, NP\_393714; *Ferroplasma acidarmanus*, ZP\_01708781; *Gibberella zeae*, EAA73228; *Haloarcula marismortui*, AAV46771; *Bacillus cereus* ATCC10987, NP\_979581; *Lactobacillus casei*, ZP\_00386368; *Bacillus cereus* ATCC10987, NP\_978349; *Escherichia coli* MccF, CAA40814. (B) rare lipoprotein A. *Acyrtosiphon pisum*, AB435384; *Aphis gossypii*, DR391796; *Toxoptera citricida*, CD450666; *Sphingopyxis alaskensis*, YP\_618011; *Bradyrhizobium* sp. ORS278, YP\_001204245; *Cytophaga hutchinsoni*, ZP\_00309644; *Comamonas testosteroni*, ZP\_01522477; *Polaromonas naphthalenivorans*, YP\_980734; *Pseudomonas fluorescens*, YP\_346566; *Pseudomonas putida*, NP\_743090; *Chromohalobacter salexigens*, YP\_573561; *Salinibacter ruber*, YP\_446246; *Borrelia burgdorferi*, AAC67080; *Rickettsia conor*, NP\_360174; *Anaplasma marginale*, YP\_153851; *Wolbachia* sp wMel, NP\_966279; *Magnetospirillum gryphiswaldense*, CAM76691; *Parvibaculum lavamentivorans*, YP\_001414372; *Maricaulis maris*, YP\_756686; *Nitrobacter winogradskyi*, ABA04727; *Nitrosospora multififormis*, ABB73623; *Nitrosomonas eutropha*, ZP\_00669959; *Neisseria meningi*, AAF40721; *Pseudomonas aeruginosa*, ZP\_00205119; *Vibrio cholerae*, AAF94110; *Shewanella frigidimarina*, ZP\_00639800; *Stenotrophomonas maltophilia*, ZP\_01645980; *Methylbium petroleiphilum*, YP\_001022529; *Hyphomonas neptunium*, YP\_760519; *Yersinia mollaretii*, ZP\_00825993; *Escherichia coli*, NP\_415166; *Oceanicaulis alexandrii*, ZP\_00951821; *Haemophilus influenzae*, NP\_438203; *Microscilla marina*, ZP\_01694079; *Shewanella putrefaciens*, ZP\_00815483; *Salinispora tropica*, YP\_001156950; *Thermobifida fusca*, YP\_289586; *Erythrobacter litoralis*, YP\_458460; *Chlorobium ferrooxidans*, ZP\_01385536; *Campylobacter fetus*, YP\_892348; *Aquifex aeolicus*, NP\_213946; *Burkholderia phytofirmans*, ZP\_01510848; *Burkholderia mallei*, YP\_104418; *Leptospirillum* sp Group II UBA, EAY55979; *Dichelobacter nodosus*, YP\_001209850; *Bradyrhizobium japonicum*, NP\_767084; *Trichodesmium erythraeum*, YP\_722449; *Crocospaera watsonii*, ZP\_00513775; *Synechocystis* sp. PCC 6803, BAA10397; *Haemophilus ducreyi*, NP\_874337; *Actinobacillus pleuropneumoniae*, ZP\_00133774; *Aquifex aeolicus*, NP\_213799.
